# Supplementary material for: Cocrystals versus Salts of Fluorescein
Source: MDPI journal article supplement (doi:10.3390/cryst11101217), 2021-10-09
Supplement: s1 [file s1]

## Cocrystals versus salts of fluorescein

Mihai Răducă <sup>1</sup> and Augustin M. Mădălan <sup>1,\*</sup><sup>1</sup> Inorganic Chemistry Department, Faculty of Chemistry, University of Bucharest, 23 Dumbrava Rosie, 020464-Bucharest, Romania; mihai.raduca@chimie.unibuc.ro; augustin.madalan@chimie.unibuc.ro

\* Correspondence: augustin.madalan@chimie.unibuc.ro

**Table S1.** Crystallographic data, details of data collection and structure refinement parameters for compounds **1-10**

| Compound                                                                                  | 1                                                              | 2                                                              | 3                                                              | 4                                                             | 5                                                             |
|-------------------------------------------------------------------------------------------|----------------------------------------------------------------|----------------------------------------------------------------|----------------------------------------------------------------|---------------------------------------------------------------|---------------------------------------------------------------|
| Chemical formula                                                                          | C <sub>50</sub> H <sub>32</sub> N <sub>2</sub> O <sub>10</sub> | C <sub>52</sub> H <sub>40</sub> N <sub>2</sub> O <sub>12</sub> | C <sub>56</sub> H <sub>46</sub> N <sub>2</sub> O <sub>12</sub> | C <sub>32</sub> H <sub>22</sub> N <sub>2</sub> O <sub>5</sub> | C <sub>32</sub> H <sub>24</sub> N <sub>2</sub> O <sub>5</sub> |
| M (g mol <sup>-1</sup> )                                                                  | 820.77                                                         | 884.86                                                         | 938.95                                                         | 514.51                                                        | 516.53                                                        |
| Temperature, (K)                                                                          | 293(2)                                                         | 200(2)                                                         | 173(2)                                                         | 293(2)                                                        | 200(2)                                                        |
| Wavelength, (Å)                                                                           | 0.71073                                                        | 0.71073                                                        | 0.71073                                                        | 0.71073                                                       | 0.71073                                                       |
| Crystal system                                                                            | <i>Monoclinic</i>                                              | <i>Triclinic</i>                                               | <i>Triclinic</i>                                               | <i>Monoclinic</i>                                             | <i>Monoclinic</i>                                             |
| Space group                                                                               | <i>P21/a</i>                                                   | <i>P-1</i>                                                     | <i>P-1</i>                                                     | <i>P21/c</i>                                                  | <i>P21/a</i>                                                  |
| <i>a</i> (Å)                                                                              | 7.9518(8)                                                      | 7.7851(8)                                                      | 7.7463(18)                                                     | 16.1599(16)                                                   | 13.109(2)                                                     |
| <i>b</i> (Å)                                                                              | 19.2982(16)                                                    | 12.6149(12)                                                    | 12.640(3)                                                      | 12.1595(8)                                                    | 12.5793(14)                                                   |
| <i>c</i> (Å)                                                                              | 12.9588(11)                                                    | 12.7770(13)                                                    | 12.950(5)                                                      | 13.0564(8)                                                    | 15.8101(14)                                                   |
| $\alpha$ (°)                                                                              | 90                                                             | 116.587(8)                                                     | 108.75(2)                                                      | 90                                                            | 90                                                            |
| $\beta$ (°)                                                                               | 95.196(8)                                                      | 107.300(8)                                                     | 100.06(3)                                                      | 101.511(7)                                                    | 102.130(13)                                                   |
| $\gamma$ (°)                                                                              | 90                                                             | 90.681(8)                                                      | 90.911(18)                                                     | 90                                                            | 90                                                            |
| <i>V</i> (Å <sup>3</sup> )                                                                | 1980.4(3)                                                      | 1055.8(2)                                                      | 1178.7(6)                                                      | 2513.9(3)                                                     | 2548.9(5)                                                     |
| <i>Z</i>                                                                                  | 2                                                              | 1                                                              | 1                                                              | 4                                                             | 4                                                             |
| <i>D<sub>c</sub></i> (g cm <sup>-3</sup> )                                                | 1.376                                                          | 1.392                                                          | 1.323                                                          | 1.359                                                         | 1.346                                                         |
| $\mu$ (mm <sup>-1</sup> )                                                                 | 0.097                                                          | 0.100                                                          | 0.093                                                          | 0.093                                                         | 0.092                                                         |
| <i>F</i> (000)                                                                            | 852                                                            | 462                                                            | 492                                                            | 1072                                                          | 1080                                                          |
| Goodness-of-fit on <i>F</i> <sup>2</sup>                                                  | 0.825                                                          | 0.927                                                          | 0.794                                                          | 1.061                                                         | 0.972                                                         |
| Final <i>R</i> <sub>1</sub> , <i>wR</i> <sub>2</sub> [ <i>I</i> >2 $\sigma$ ( <i>I</i> )] | 0.0403, 0.0909                                                 | 0.0526, 0.0921                                                 | 0.0444, 0.0786                                                 | 0.0937, 0.1929                                                | 0.0715, 0.1462                                                |
| <i>R</i> <sub>1</sub> , <i>wR</i> <sub>2</sub> (all data)                                 | 0.0883, 0.1051                                                 | 0.1281, 0.1162                                                 | 0.1252, 0.0961                                                 | 0.1943, 0.2386                                                | 0.1863, 0.2029                                                |

  

| Compound                                                                                  | 6                                                             | 7                                                             | 8                                                             | 9                                                                | 10                                                             |
|-------------------------------------------------------------------------------------------|---------------------------------------------------------------|---------------------------------------------------------------|---------------------------------------------------------------|------------------------------------------------------------------|----------------------------------------------------------------|
| Chemical formula                                                                          | C <sub>25</sub> H <sub>22</sub> N <sub>2</sub> O <sub>7</sub> | C <sub>25</sub> H <sub>18</sub> N <sub>2</sub> O <sub>5</sub> | C <sub>26</sub> H <sub>32</sub> N <sub>2</sub> O <sub>8</sub> | C <sub>47</sub> H <sub>45</sub> N <sub>2</sub> O <sub>12.5</sub> | C <sub>98</sub> H <sub>98</sub> N <sub>6</sub> O <sub>24</sub> |
| M (g mol <sup>-1</sup> )                                                                  | 462.44                                                        | 426.41                                                        | 500.53                                                        | 837.85                                                           | 1743.82                                                        |
| Temperature, (K)                                                                          | 200(2)                                                        | 293(2)                                                        | 173(2)                                                        | 293(2)                                                           | 293(2)                                                         |
| Wavelength, (Å)                                                                           | 0.71073                                                       | 0.71073                                                       | 0.71073                                                       | 0.71073                                                          | 0.71073                                                        |
| Crystal system                                                                            | <i>Triclinic</i>                                              | <i>Monoclinic</i>                                             | <i>Triclinic</i>                                              | <i>Triclinic</i>                                                 | <i>Triclinic</i>                                               |
| Space group                                                                               | <i>P-1</i>                                                    | <i>C2/c</i>                                                   | <i>P-1</i>                                                    | <i>P-1</i>                                                       | <i>P-1</i>                                                     |
| <i>a</i> (Å)                                                                              | 7.9208(13)                                                    | 26.783(4)                                                     | 8.0595(6)                                                     | 11.2955(3)                                                       | 11.8141(12)                                                    |
| <i>b</i> (Å)                                                                              | 11.1684(19)                                                   | 19.468(3)                                                     | 11.4011(10)                                                   | 13.9824(3)                                                       | 13.8225(13)                                                    |
| <i>c</i> (Å)                                                                              | 14.678(3)                                                     | 7.7431(13)                                                    | 13.5000(10)                                                   | 14.1629(3)                                                       | 14.5549(17)                                                    |
| $\alpha$ (°)                                                                              | 111.235(14)                                                   | 90                                                            | 87.086(6)                                                     | 97.069(2)                                                        | 98.060(8)                                                      |
| $\beta$ (°)                                                                               | 92.364(14)                                                    | 94.033(13)                                                    | 74.482(6)                                                     | 108.163(2)                                                       | 103.933(9)                                                     |
| $\gamma$ (°)                                                                              | 109.493(13)                                                   | 90                                                            | 80.885(6)                                                     | 102.315(2)                                                       | 109.797(7)                                                     |
| <i>V</i> (Å <sup>3</sup> )                                                                | 1121.3(4)                                                     | 4027.5(11)                                                    | 1180.12(17)                                                   | 2032.75(9)                                                       | 2105.6(4)                                                      |
| <i>Z</i>                                                                                  | 2                                                             | 8                                                             | 2                                                             | 2                                                                | 1                                                              |
| <i>D<sub>c</sub></i> (g cm <sup>-3</sup> )                                                | 1.370                                                         | 1.406                                                         | 1.409                                                         | 1.369                                                            | 1.375                                                          |
| $\mu$ (mm <sup>-1</sup> )                                                                 | 0.101                                                         | 0.099                                                         | 0.105                                                         | 0.100                                                            | 0.099                                                          |
| <i>F</i> (000)                                                                            | 484                                                           | 1776                                                          | 532                                                           | 882                                                              | 920                                                            |
| Goodness-of-fit on <i>F</i> <sup>2</sup>                                                  | 1.007                                                         | 0.891                                                         | 0.987                                                         | 1.103                                                            | 0.808                                                          |
| Final <i>R</i> <sub>1</sub> , <i>wR</i> <sub>2</sub> [ <i>I</i> >2 $\sigma$ ( <i>I</i> )] | 0.0701, 0.0974                                                | 0.0780, 0.1766                                                | 0.0475, 0.1133                                                | 0.0438, 0.1192                                                   | 0.0605, 0.1317                                                 |
| <i>R</i> <sub>1</sub> , <i>wR</i> <sub>2</sub> (all data)                                 | 0.1908, 0.1329                                                | 0.2427, 0.2557                                                | 0.0858, 0.1265                                                | 0.0536, 0.1257                                                   | 0.1846, 0.1713                                                 |

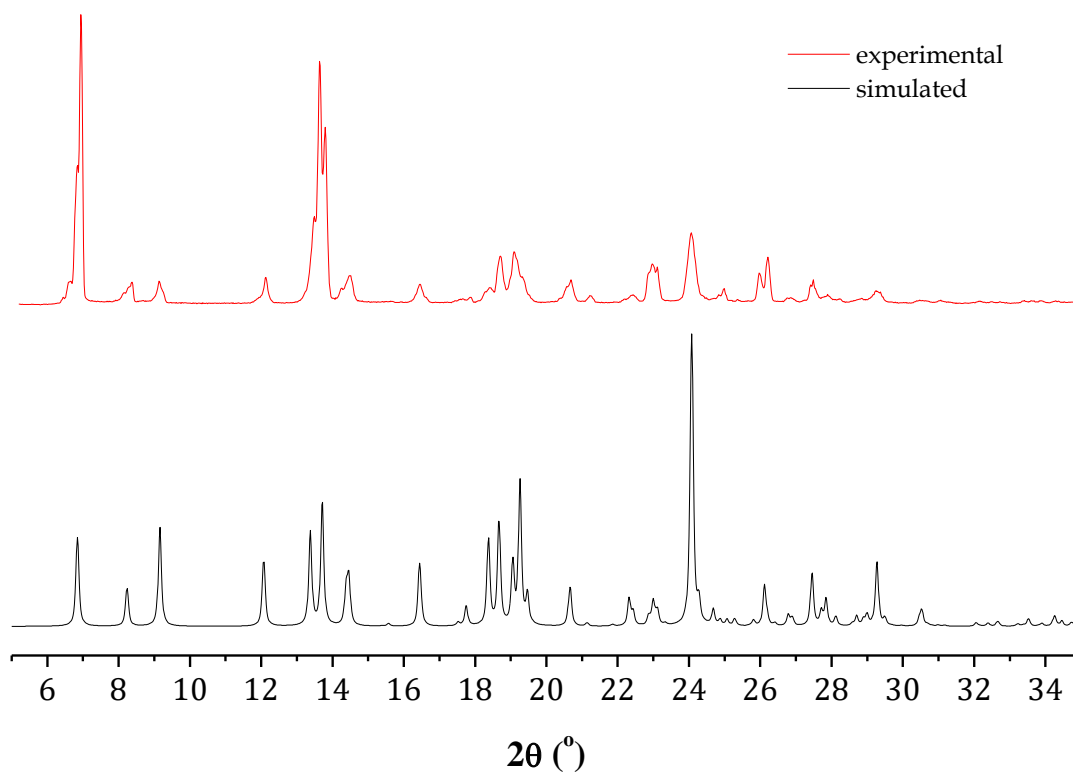

**Figure S1.** Measured (red) and calculated (black) powder X-ray diffraction patterns of **1**.

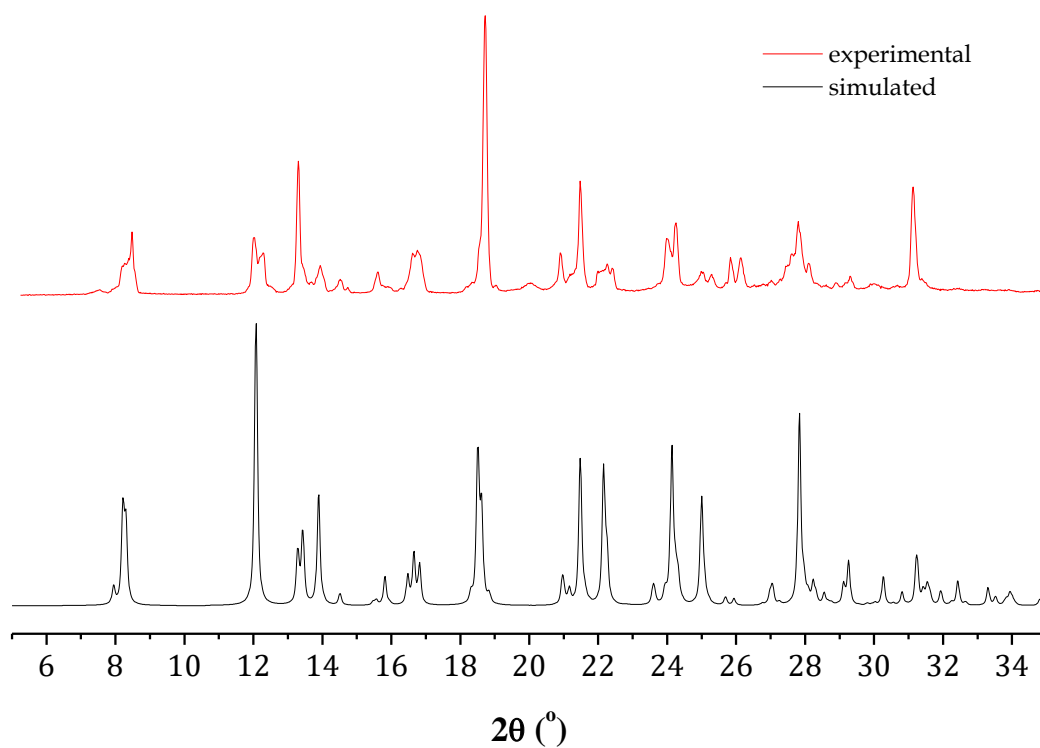

**Figure S2.** Measured (red) and calculated (black) powder X-ray diffraction patterns of **2**.

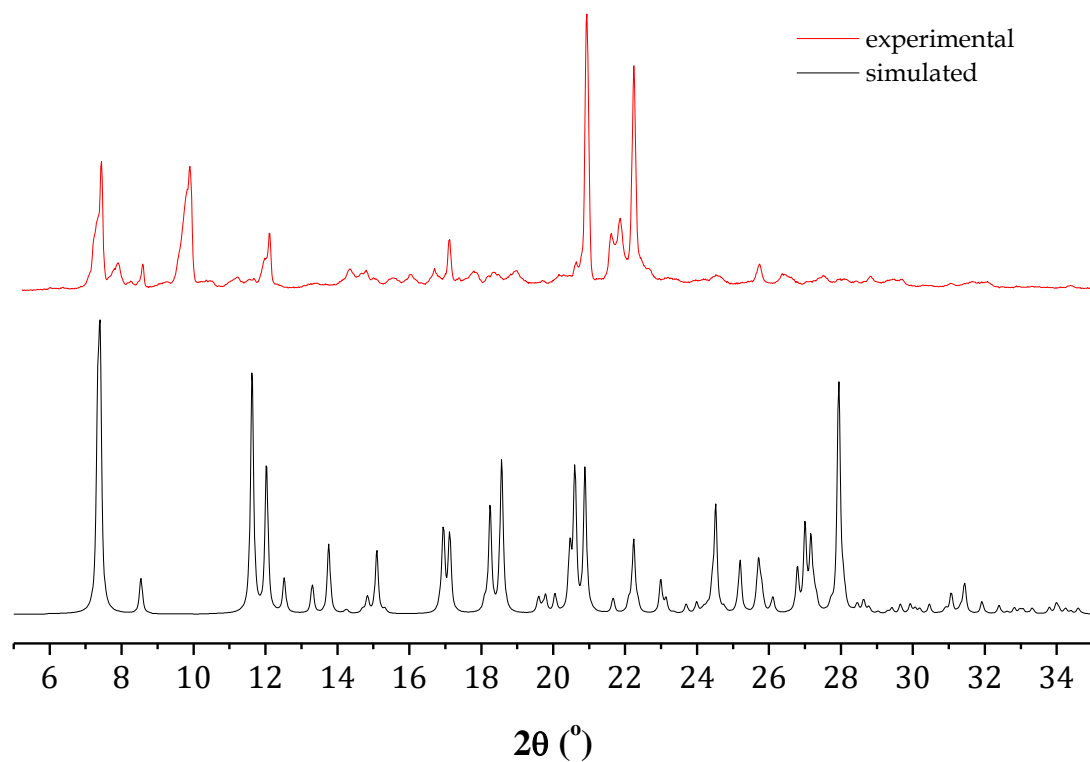

**Figure S3.** Measured (red) and calculated (black) powder X-ray diffraction patterns of **3**.

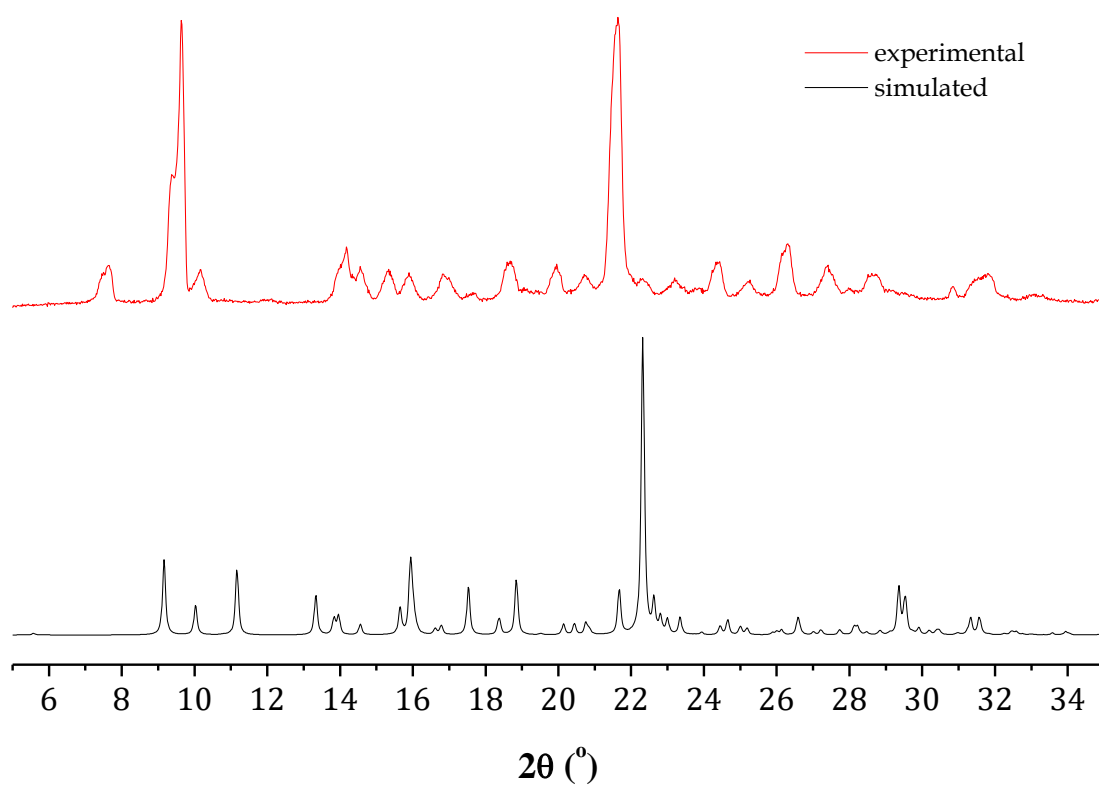

**Figure S4.** Measured (red) and calculated (black) powder X-ray diffraction patterns of **4**.

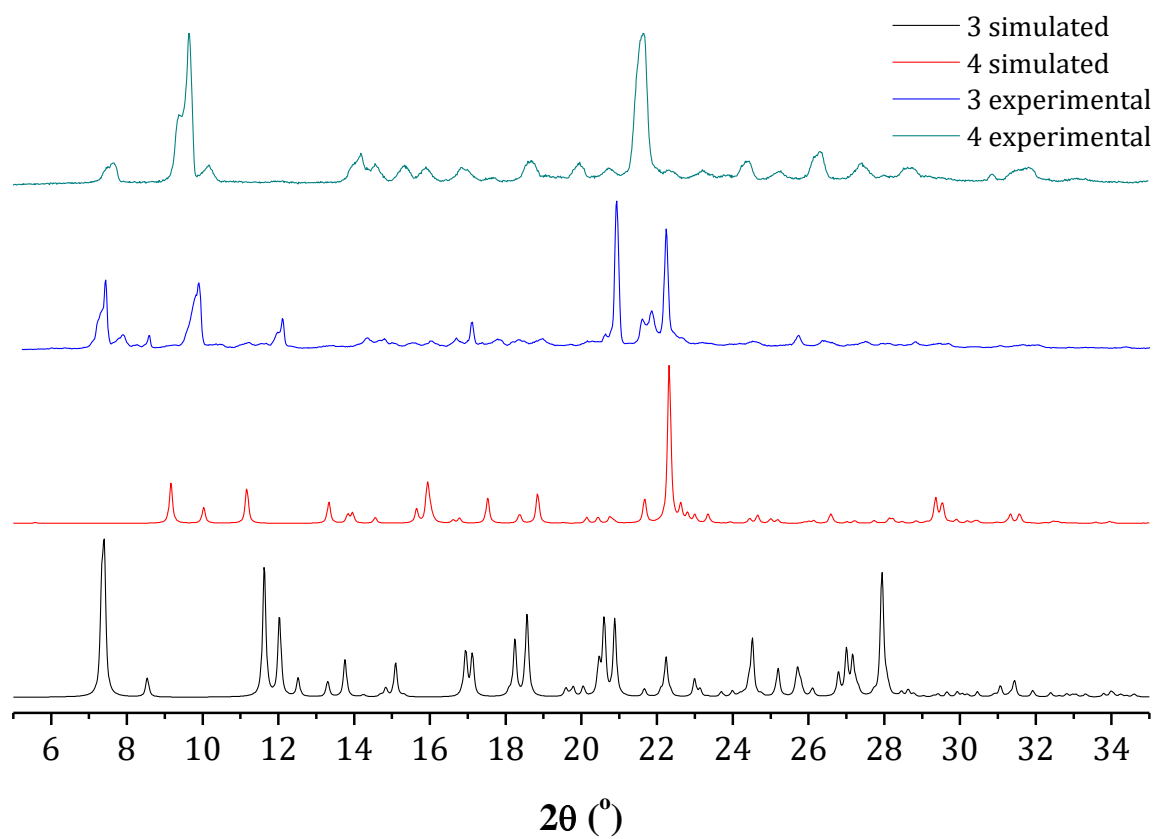

**Figure S5.** Comparison between powder X-ray diffraction patterns of **3** and **4**.

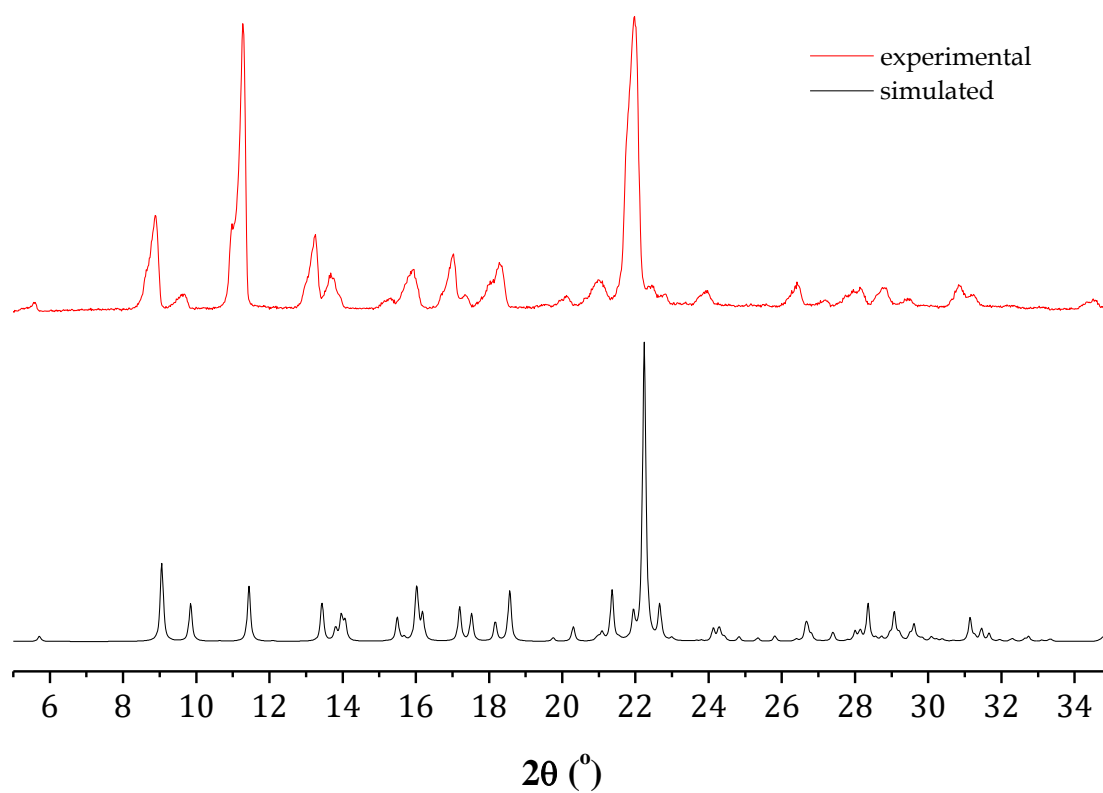

**Figure S6.** Measured (red) and calculated (black) powder X-ray diffraction patterns of **5**.

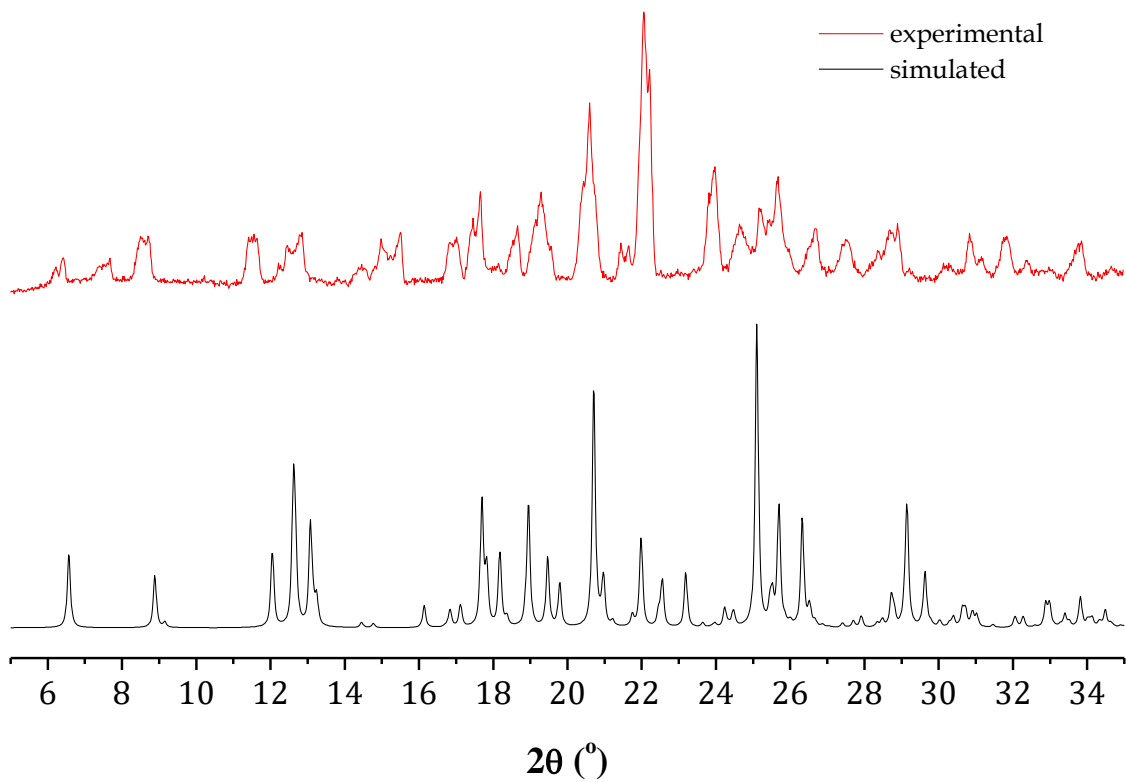

**Figure S7.** Measured (red) and calculated (black) powder X-ray diffraction patterns of **6**.

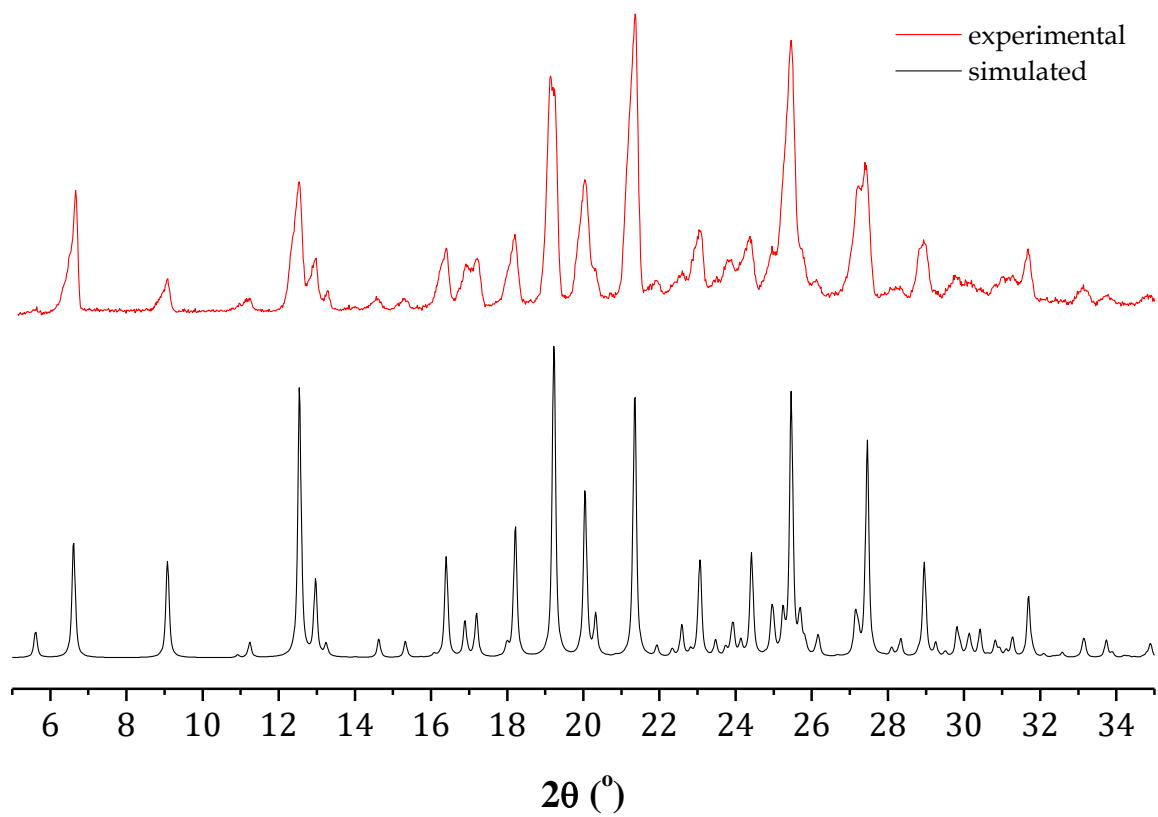

**Figure S8.** Measured (red) and calculated (black) powder X-ray diffraction patterns of **7**.

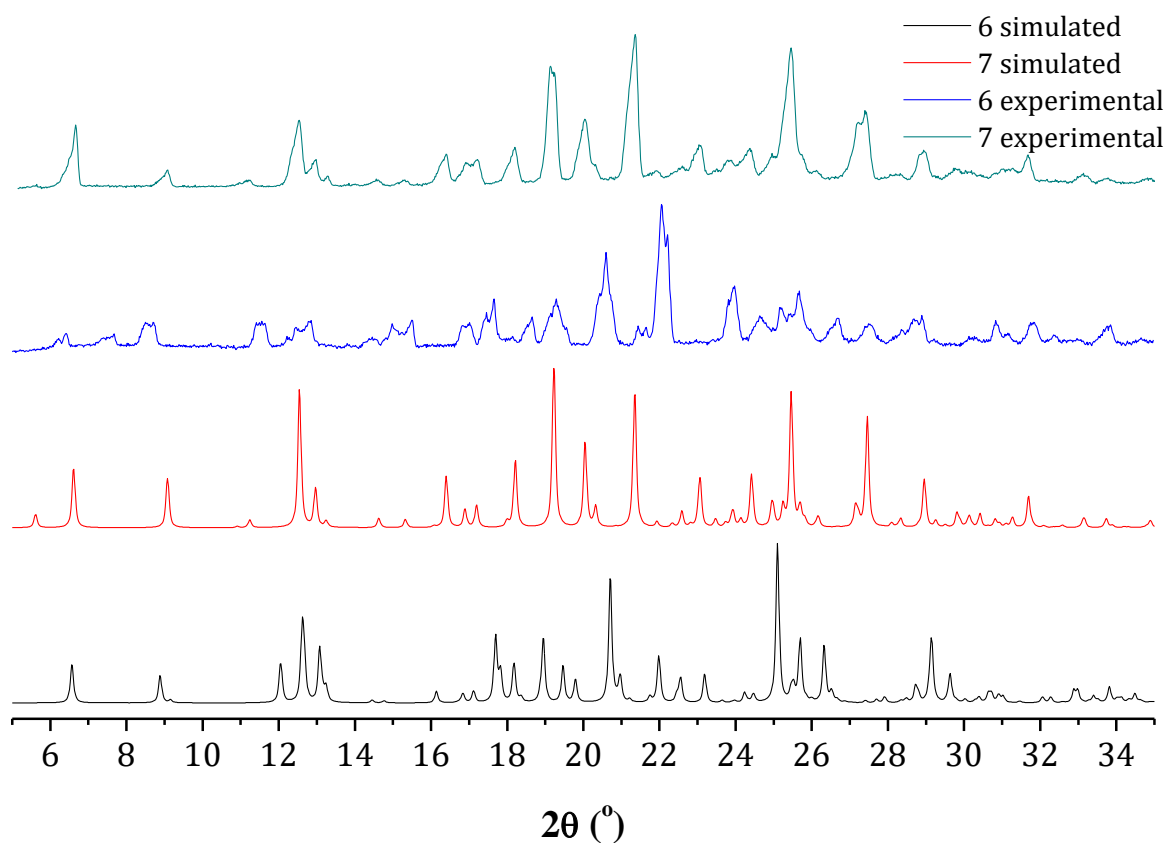

**Figure S9.** Comparison between powder X-ray diffraction patterns of **6** and **7**.

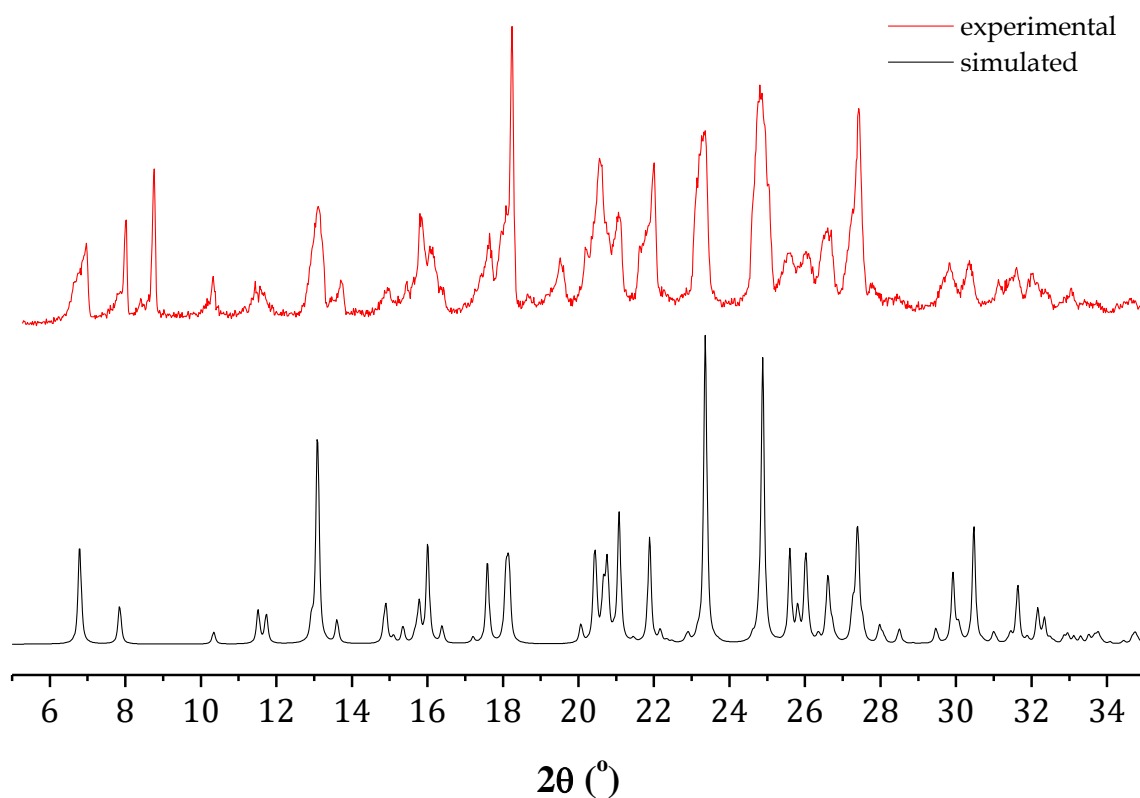

**Figure S10.** Measured (red) and calculated (black) powder X-ray diffraction patterns of **8**.

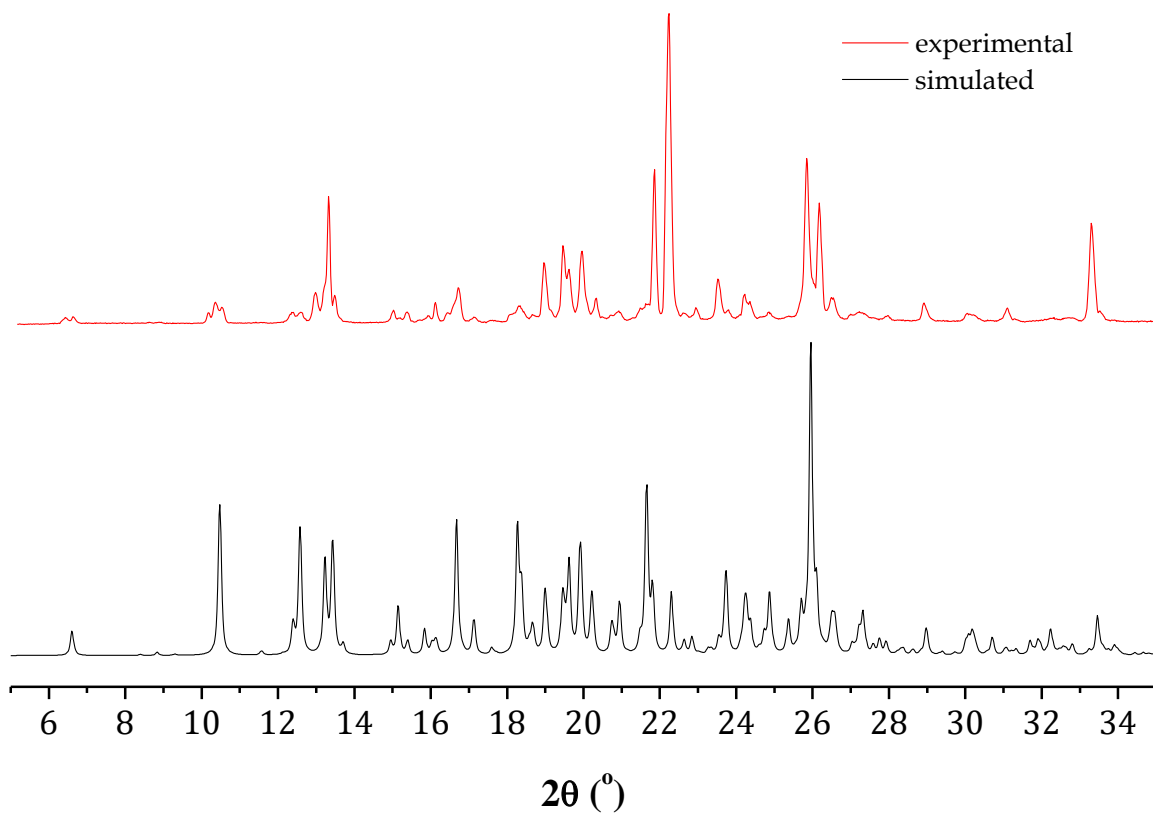

**Figure S11.** Measured (red) and calculated (black) powder X-ray diffraction patterns of **9**.

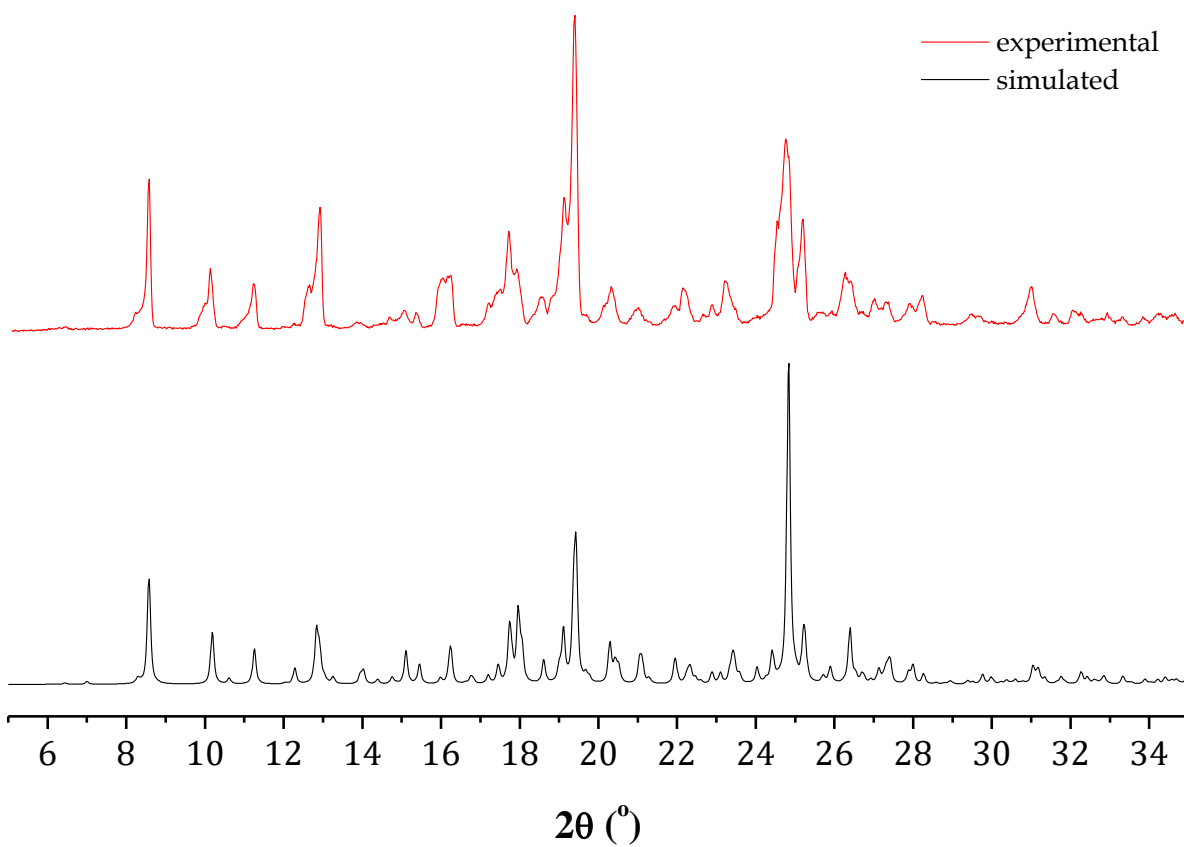

**Figure S12.** Measured (red) and calculated (black) powder X-ray diffraction patterns of **10**.

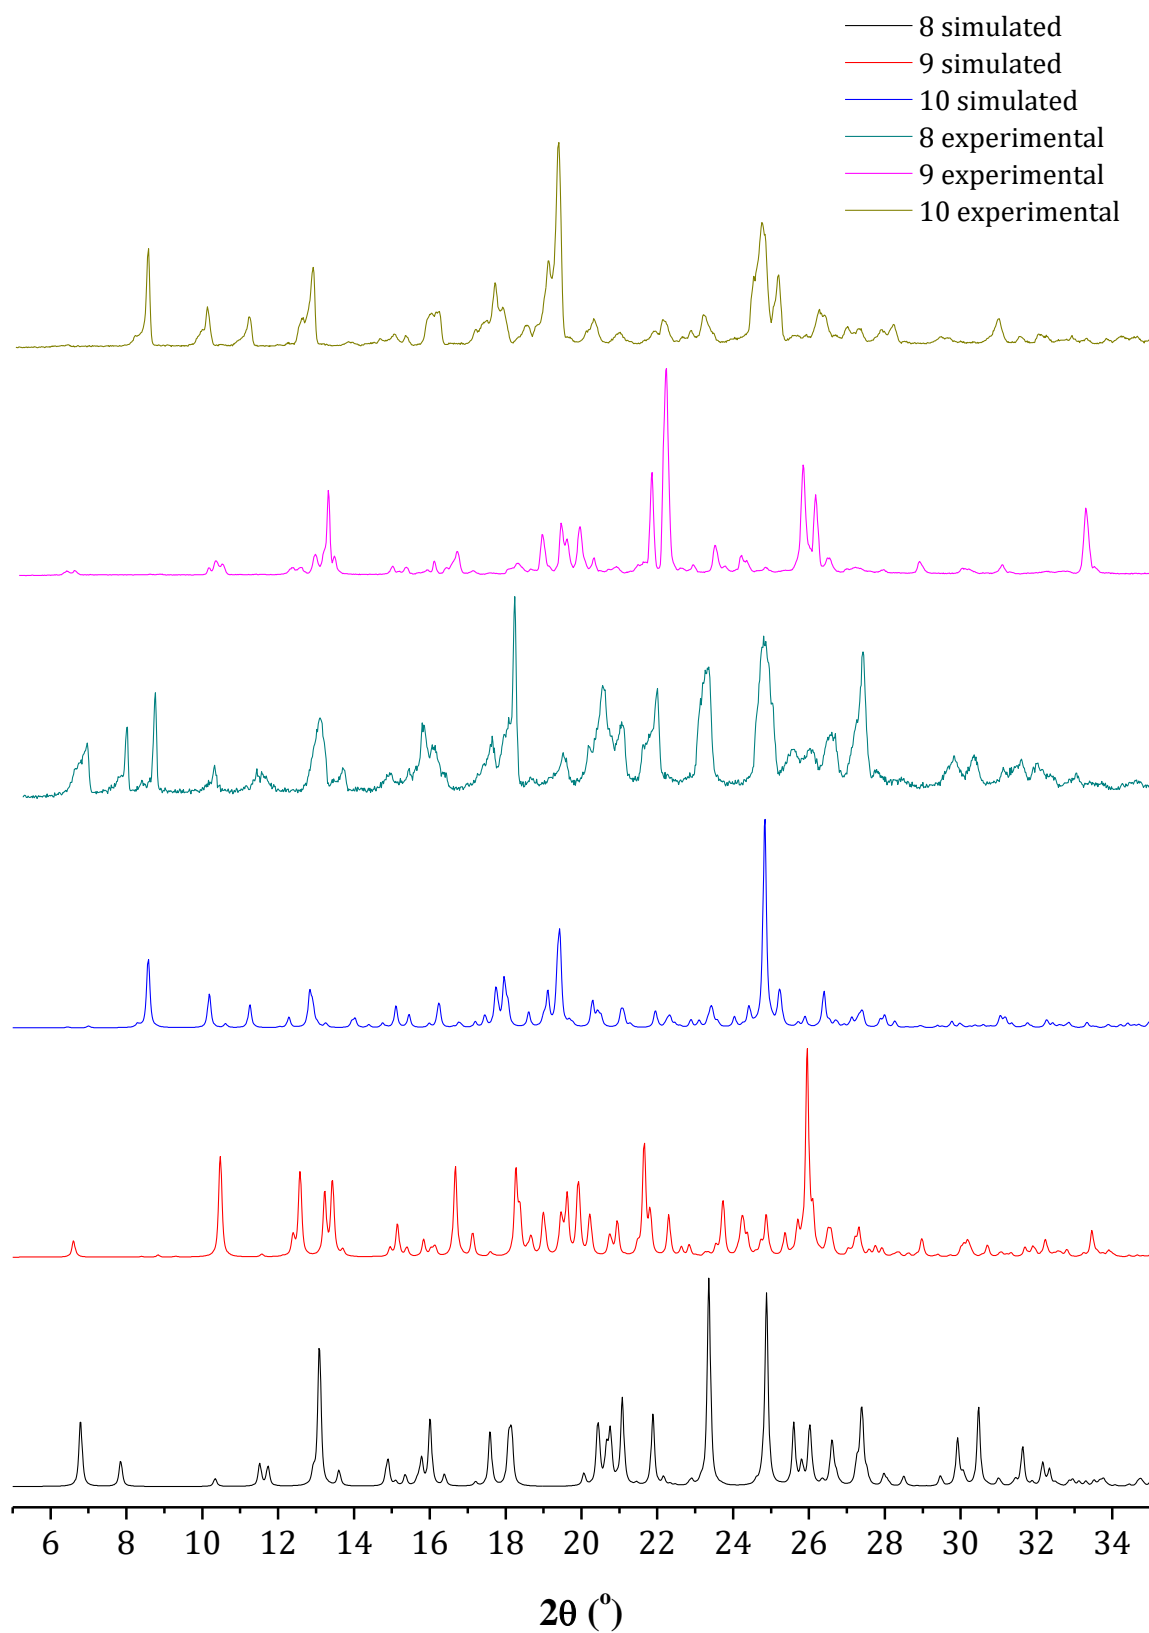

**Figure S13.** Comparison between powder X-ray diffraction patterns of **8**, **9** and **10**.
